# Supplementary material
Source: PubMed Central journal article supplement (PMC6536369)
Supplement: NIHMS1512112-supplement-1.pdf [file NIHMS1512112-supplement-1.pdf]

## Supplemental

**Summary:** The following tables describe toenail metal levels stratified by sources from consumption, correlation between different metal levels (e.g., Pb-As), or toenail metal levels stratified by smoking status.

Table 1. Average toenail Mn, As, and Hg levels (log values) from first visit with toenail metal data stratified by Mn in supplements, consumption of whole grains, and frequency of consumption of canned tuna.

|                                                         | Toenail Metal | n   | Mean   | SD    | Median | IQR   |
|---------------------------------------------------------|---------------|-----|--------|-------|--------|-------|
| <b>No Mn supplements</b>                                | Mn            | 759 | -0.549 | 0.442 | -0.573 | 0.575 |
| <b>Taking Mn supplements<sup>1</sup></b>                | Mn            | 97  | -0.467 | 0.357 | -0.458 | 0.457 |
| <b>Reported no consumption of whole grains</b>          | Mn            | 724 | -0.559 | 0.444 | -0.583 | 0.576 |
| <b>Reported consumption of whole grains<sup>2</sup></b> | Mn            | 347 | -0.454 | 0.420 | -0.476 | 0.577 |
| <b>Reported no consumption of whole grains</b>          | As            | 765 | -1.108 | 0.316 | -1.150 | 0.361 |
| <b>Reported consumption of whole grains<sup>3</sup></b> | As            | 347 | -1.048 | 0.261 | -1.068 | 0.331 |
| <b>Canned tuna consumption 1/week or less</b>           | Hg            | 670 | -0.631 | 0.407 | -0.630 | 0.558 |
| <b>Canned tuna consumption &gt;1/week<sup>4</sup></b>   | Hg            | 98  | -0.467 | 0.300 | -0.449 | 0.432 |

n= first visits with toenail metal data and consumption status. The first visit an individual reported not having Mn supplements and having toenail Mn data is counted as one out of the 759. The first visit an individual reported having Mn supplements and having toenail Mn data is counted as one out of the 97. Some individuals contributed to both consumption groups.

SD= standard deviation

IQR= interquartile range

Student's t-test of means of toenail metal between consumption groups, two-sided, p-values:

<sup>1</sup>p=0.04

<sup>2</sup>p<0.001

<sup>3</sup>p<0.001

<sup>4</sup>p<0.001

Table 2. Correlations between metal measurements at first visit with donated toenails, 1992 to 2014 (top: Spearman's rho, middle: p-value, bottom: number of participants)

|           | <b>Pb</b> | <b>As</b> | <b>Cd</b> | <b>Mn</b> | <b>Hg</b> | <b>Blood Pb</b> |
|-----------|-----------|-----------|-----------|-----------|-----------|-----------------|
| <b>Pb</b> | 1         | 0.40      | 0.55      | 0.46      | -0.03     | 0.31            |
|           |           | <.0001    | <.0001    | <.0001    | 0.395     | <.0001          |
|           | 813       | 791       | 812       | 792       | 678       | 749             |
| <b>As</b> |           | 1         | 0.27      | 0.54      | 0.08      | 0.10            |
|           |           |           | <.0001    | <.0001    | 0.045     | 0.0056          |
|           |           | 815       | 790       | 791       | 656       | 751             |
| <b>Cd</b> |           |           | 1         | 0.39      | 0.02      | 0.17            |
|           |           |           |           | <.0001    | 0.653     | <.0001          |
|           |           |           | 812       | 791       | 678       | 749             |
| <b>Mn</b> |           |           |           | 1         | -0.05     | 0.04            |
|           |           |           |           |           | 0.186     | 0.263           |
|           |           |           |           | 792       | 657       | 728             |
| <b>Hg</b> |           |           |           |           | 1         | -0.03           |
|           |           |           |           |           |           | 0.398           |
|           |           |           |           |           | 678       | 632             |

Table 3. Number of participants and median (IQR) metal concentration by order of donated toenail sample<sup>1</sup>, 1992 to 2014.

|                     | <b>1</b> | <b>2</b> | <b>3</b> | <b>4</b> | <b>5</b> | <b>6</b> |
|---------------------|----------|----------|----------|----------|----------|----------|
| <b>Lead, n</b>      | 790      | 490      | 302      | 170      | 55       | 11       |
| <b>%</b>            | 100.0    | 62.0     | 38.2     | 21.5     | 7.0      | 1.4      |
| <b>Median, µg/g</b> | 0.323    | 0.261    | 0.242    | 0.192    | 0.184    | 0.116    |
| <b>IQR</b>          | 0.541    | 0.475    | 0.406    | 0.414    | 0.301    | 0.171    |
| <b>Arsenic, n</b>   | 804      | 511      | 304      | 176      | 58       | 13       |
| <b>%</b>            | 100.0    | 63.6     | 37.8     | 21.9     | 7.2      | 1.6      |
| <b>Median, µg/g</b> | 0.071    | 0.077    | 0.075    | 0.071    | 0.069    | 0.054    |
| <b>IQR</b>          | 0.063    | 0.060    | 0.052    | 0.060    | 0.051    | 0.019    |
| <b>Cadmium, n</b>   | 789      | 490      | 302      | 169      | 52       | 10       |
| <b>%</b>            | 100.0    | 62.1     | 38.3     | 21.4     | 6.6      | 1.3      |
| <b>Median, µg/g</b> | 0.018    | 0.014    | 0.012    | 0.012    | 0.011    | 0.010    |
| <b>IQR</b>          | 0.033    | 0.021    | 0.019    | 0.019    | 0.015    | 0.024    |
| <b>Manganese, n</b> | 766      | 478      | 290      | 167      | 47       | 9        |
| <b>%</b>            | 100.0    | 62.4     | 37.9     | 21.8     | 6.1      | 1.2      |
| <b>Median, µg/g</b> | 0.270    | 0.283    | 0.281    | 0.248    | 0.257    | 0.205    |
| <b>IQR</b>          | 0.398    | 0.398    | 0.324    | 0.397    | 0.423    | 0.089    |
| <b>Mercury, n</b>   | 711      | 362      | 145      | 42       | 5        | 1        |
| <b>%</b>            | 100.0    | 50.9     | 20.4     | 5.9      | 0.7      | 0.1      |
| <b>Median, µg/g</b> | 0.252    | 0.192    | 0.161    | 0.155    | 0.156    | 0.165    |
| <b>IQR</b>          | 0.339    | 0.252    | 0.191    | 0.123    | 0.068    | 0.000    |

<sup>1</sup>Not all visits had toenail samples. Order of samples donated (1=first, 2=second, etc.) utilized to standardize table.

Table 4. Number of subjects and median toenail lead levels ordered by donated toenail sample<sup>1</sup> and stratified by smoking status, 1992 to 2014

|                     | 1     | 2     | 3     | 4     | 5     | 6     |
|---------------------|-------|-------|-------|-------|-------|-------|
| All (n)             | 790   | 490   | 302   | 170   | 55    | 11    |
| %                   | 100   | 62.0  | 38.2  | 21.5  | 7.0   | 1.4   |
| Median (ug/g)       | 0.323 | 0.261 | 0.242 | 0.192 | 0.184 | 0.116 |
| Never Smokers (n)   | 244   | 157   | 95    | 56    | 13    | 5     |
| %                   | 100   | 64.3  | 38.9  | 23.0  | 5.3   | 2.0   |
| Median (ug/g)       | 0.318 | 0.262 | 0.296 | 0.276 | 0.232 | 0.060 |
| Former Smokers (n)  | 509   | 316   | 193   | 106   | 39    | 6     |
| %                   | 100   | 62.1  | 37.9  | 20.8  | 7.7   | 1.2   |
| Median (ug/g)       | 0.341 | 0.262 | 0.216 | 0.180 | 0.159 | 0.141 |
| Current Smokers (n) | 35    | 17    | 13    | 8     | 3     | 0     |
| %                   | 100   | 48.6  | 37.1  | 22.9  | 8.6   | 0.0   |
| Median (ug/g)       | 0.300 | 0.223 | 0.231 | 0.070 | 0.073 | —     |

<sup>1</sup>Not all visits had toenail samples. Order of samples donated (1=first, 2=second, etc.) utilized to standardize table.

Table 5. Number of subjects and median toenail arsenic levels ordered by donated toenail sample<sup>1</sup> and stratified by smoking status, 1992 to 2014

|                     | 1     | 2     | 3     | 4     | 5     | 6     |
|---------------------|-------|-------|-------|-------|-------|-------|
| All (n)             | 804   | 511   | 304   | 176   | 58    | 13    |
| %                   | 100.0 | 63.6  | 37.8  | 21.9  | 7.2   | 1.6   |
| Median (ug/g)       | 0.071 | 0.077 | 0.075 | 0.071 | 0.069 | 0.054 |
| Never Smokers (n)   | 251   | 158   | 98    | 60    | 16    | 6     |
| %                   | 100.0 | 62.9  | 39.0  | 23.9  | 6.4   | 2.4   |
| Median (ug/g)       | 0.067 | 0.074 | 0.076 | 0.070 | 0.081 | 0.056 |
| Former Smokers (n)  | 518   | 335   | 191   | 107   | 39    | 7     |
| %                   | 100.0 | 64.7  | 36.9  | 20.7  | 7.5   | 1.4   |
| Median (ug/g)       | 0.072 | 0.080 | 0.075 | 0.070 | 0.069 | 0.053 |
| Current Smokers (n) | 33    | 18    | 14    | 9     | 3     | 0     |
| %                   | 100.0 | 54.5  | 42.4  | 27.3  | 9.1   | 0.0   |
| Median (ug/g)       | 0.068 | 0.070 | 0.097 | 0.078 | 0.067 | —     |

<sup>1</sup>Not all visits had toenail samples. Order of samples donated (1=first, 2=second, etc.) utilized to standardize table.

Table 6. Number of subjects and median toenail cadmium ordered by donated toenail sample<sup>1</sup> and stratified by smoking status, 1992 to 2014

|                     | 1     | 2     | 3     | 4     | 5     | 6     |
|---------------------|-------|-------|-------|-------|-------|-------|
| All (n)             | 789   | 490   | 302   | 169   | 52    | 10    |
| %                   | 100.0 | 62.1  | 38.3  | 21.4  | 6.6   | 1.3   |
| Median (ug/g)       | 0.018 | 0.014 | 0.012 | 0.012 | 0.011 | 0.010 |
| Never Smokers (n)   | 244   | 157   | 95    | 55    | 12    | 4     |
| %                   | 100.0 | 64.3  | 38.9  | 22.5  | 4.9   | 1.6   |
| Median (ug/g)       | 0.018 | 0.013 | 0.013 | 0.011 | 0.016 | 0.022 |
| Former Smokers (n)  | 509   | 316   | 193   | 106   | 37    | 6     |
| %                   | 100.0 | 62.1  | 37.9  | 20.8  | 7.3   | 1.2   |
| Median (ug/g)       | 0.018 | 0.014 | 0.011 | 0.012 | 0.011 | 0.008 |
| Current Smokers (n) | 35    | 17    | 13    | 8     | 3     | 0     |
| %                   | 100.0 | 48.6  | 37.1  | 22.9  | 8.6   | 0.0   |
| Median (ug/g)       | 0.016 | 0.017 | 0.015 | 0.015 | 0.023 | —     |

<sup>1</sup>Not all visits had toenail samples. Order of samples donated (1=first, 2=second, etc.) utilized to standardize table.

Table 7. Number of subjects and median toenail manganese levels ordered by donated toenail sample<sup>1</sup> and stratified by smoking status, 1992 to 2014

|                     | 1     | 2     | 3     | 4     | 5     | 6     |
|---------------------|-------|-------|-------|-------|-------|-------|
| All (n)             | 766   | 478   | 290   | 167   | 47    | 9     |
| %                   | 100.0 | 62.4  | 37.9  | 21.8  | 6.1   | 1.2   |
| Median (ug/g)       | 0.270 | 0.283 | 0.281 | 0.248 | 0.257 | 0.205 |
| Never Smokers (n)   | 239   | 153   | 92    | 55    | 13    | 4     |
| %                   | 100.0 | 64.0  | 38.5  | 23.0  | 5.4   | 1.7   |
| Median (ug/g)       | 0.244 | 0.281 | 0.276 | 0.320 | 0.342 | 0.278 |
| Former Smokers (n)  | 495   | 308   | 184   | 104   | 32    | 5     |
| %                   | 100.0 | 62.2  | 37.2  | 21.0  | 6.5   | 1.0   |
| Median (ug/g)       | 0.280 | 0.290 | 0.280 | 0.233 | 0.226 | 0.169 |
| Current Smokers (n) | 30    | 17    | 13    | 8     | 2     | 0     |
| %                   | 100.0 | 56.7  | 43.3  | 26.7  | 6.7   | 0.0   |
| Median (ug/g)       | 0.374 | 0.278 | 0.335 | 0.307 | 1.266 | —     |

<sup>1</sup>Not all visits had toenail samples. Order of samples donated (1=first, 2=second, etc.) utilized to standardize table.

Table 8. Number of subjects and median toenail mercury levels ordered by donated toenail sample<sup>1</sup> and stratified by smoking status, 1992 to 2014

|                     | 1     | 2     | 3     | 4     | 5     | 6     |
|---------------------|-------|-------|-------|-------|-------|-------|
| All (n)             | 711   | 362   | 145   | 42    | 5     | 1     |
| %                   | 100.0 | 50.9  | 20.4  | 5.9   | 0.7   | 0.1   |
| Median (ug/g)       | 0.252 | 0.192 | 0.161 | 0.155 | 0.156 | 0.165 |
| Never Smokers (n)   | 218   | 109   | 49    | 10    | 2     | 0     |
| %                   | 100.0 | 50.0  | 22.5  | 4.6   | 0.9   | 0.0   |
| Median (ug/g)       | 0.214 | 0.163 | 0.146 | 0.120 | 0.401 | —     |
| Former Smokers (n)  | 459   | 239   | 88    | 29    | 2     | 1     |
| %                   | 100.0 | 52.1  | 19.2  | 6.3   | 0.4   | 0.2   |
| Median (ug/g)       | 0.285 | 0.203 | 0.177 | 0.161 | 0.185 | 0.165 |
| Current Smokers (n) | 34    | 13    | 8     | 3     | 1     | 0     |
| %                   | 100.0 | 38.2  | 23.5  | 8.8   | 2.9   | 0.0   |
| Median (ug/g)       | 0.189 | 0.103 | 0.134 | 0.146 | 0.147 | —     |

<sup>1</sup>Not all visits had toenail samples. Order of samples donated (1=first, 2=second, etc.) utilized to standardize table.

Table 9. Number of subjects and median blood lead levels ordered by donated toenail sample<sup>1</sup> and stratified by smoking status, 1992 to 2008

|                     | 1     | 2    | 3    | 4    | 5    |
|---------------------|-------|------|------|------|------|
| All (n)             | 1256  | 1012 | 728  | 389  | 78   |
| %                   | 100.0 | 80.6 | 58.0 | 31.0 | 6.2  |
| Median (ug/dL)      | 5.00  | 4.00 | 4.00 | 3.00 | 3.00 |
| Never Smokers (n)   | 377   | 301  | 227  | 121  | 32   |
| %                   | 100.0 | 79.8 | 60.2 | 32.1 | 8.5  |
| Median (ug/dL)      | 5.00  | 4.00 | 3.00 | 3.00 | 3.00 |
| Former Smokers (n)  | 779   | 650  | 468  | 253  | 42   |
| %                   | 100.0 | 83.4 | 60.1 | 32.5 | 5.4  |
| Median (ug/dL)      | 5.00  | 4.00 | 4.00 | 3.00 | 3.00 |
| Current Smokers (n) | 100   | 61   | 33   | 15   | 4    |
| %                   | 100.0 | 61.0 | 33.0 | 15.0 | 4.0  |
| Median (ug/dL)      | 6.00  | 5.00 | 5.00 | 3.00 | 3.00 |

<sup>1</sup>Not all visits had toenail samples. Order of samples donated (1=first, 2=second, etc.) utilized to standardize table.
